# Supplementary material for: Strong, flexible, and highly conductive cellulose nanofibril/PEDOT:PSS/MXene nanocomposite films for efficient electromagnetic interference shielding
Source: Royal Society of Chemistry journal article supplement (doi:10.1039/d2nr00468b), 2022-01-01
Supplement: d2nr00468b1.pdf [file d2nr00468b1.pdf]

## Supporting Information

### **Strong, flexible, and highly conductive cellulose nanofibril/PEDOT:PSS/MXene nanocomposite films for efficient electromagnetic interference shielding**

Kun Liu,<sup>†a</sup> Haishun Du,<sup>†b\*</sup> Wei Liu,<sup>a</sup> Meng Zhang,<sup>a</sup> Yaxuan Wang,<sup>a</sup> Huayu Liu,<sup>a</sup> Xinyu Zhang<sup>b</sup>, Ting Xu<sup>\*a</sup>, and Chuanling Si<sup>\*a</sup>

<sup>a</sup> Tianjin Key Laboratory of Pulp and Paper, Tianjin University of Science and Technology, Tianjin 300457, China

Email: sichli@tust.edu.cn; xuting@tust.edu.cn

<sup>b</sup> Department of Chemical Engineering, Auburn University, Auburn AL-36849, USA

Email: hzd0024@auburn.edu

<sup>†</sup>These authors contributed equally to this work.

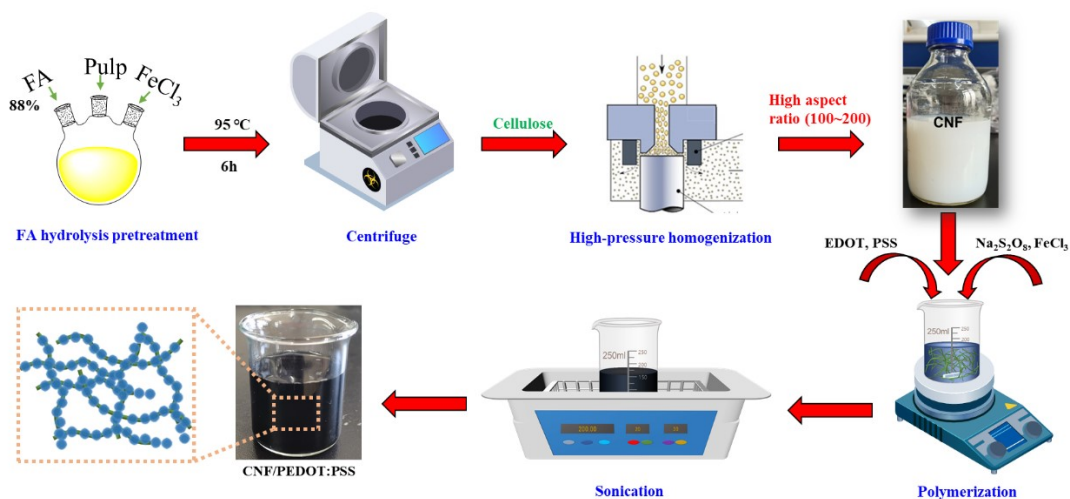

**Scheme S1.** Schematic illustration of preparation of CNF/PEDOT:PSS.

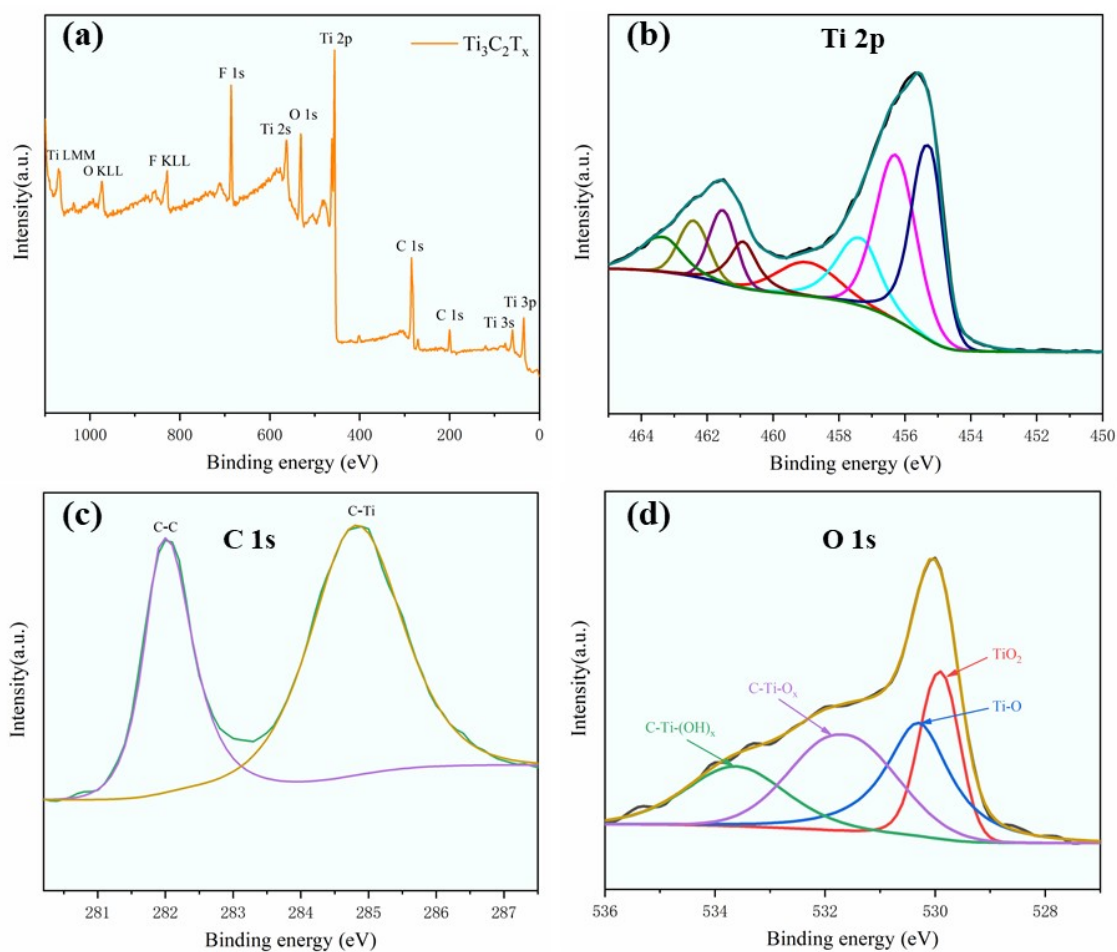

**Figure S1.** (a) Survey XPS spectrum of the  $Ti_3C_2T_x$ , (b) Ti 2p spectra, (c) C 1s spectra and (d) O 1s spectra of sample.

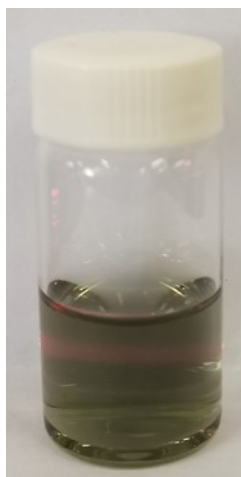

**Figure S2.** Tyndall effect of  $\text{Ti}_3\text{C}_2\text{T}_x$  nanosheet aqueous dispersion.

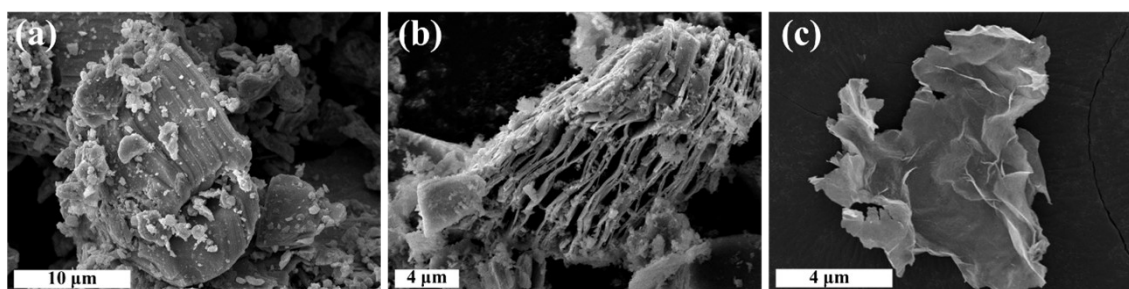

**Figure S3.** SEM images of  $\text{Ti}_3\text{AlC}_2$  MAX (a), m- $\text{Ti}_3\text{C}_2\text{T}_x$  (b) and d- $\text{Ti}_3\text{C}_2\text{T}_x$  (c).

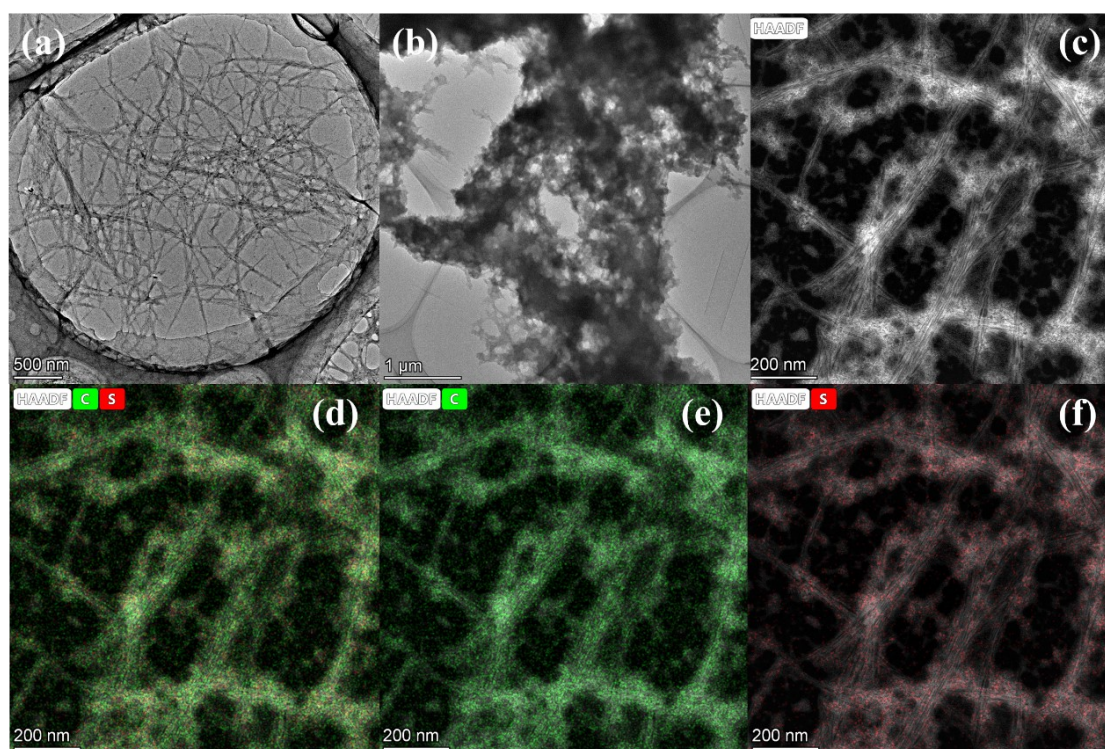

**Figure S4.** TEM images of CNF (a), PEDOT:PSS (b). HAADF-STEM image of CNF/PEDOT:PSS (c) and the corresponding elemental mappings of C and S (d, f).

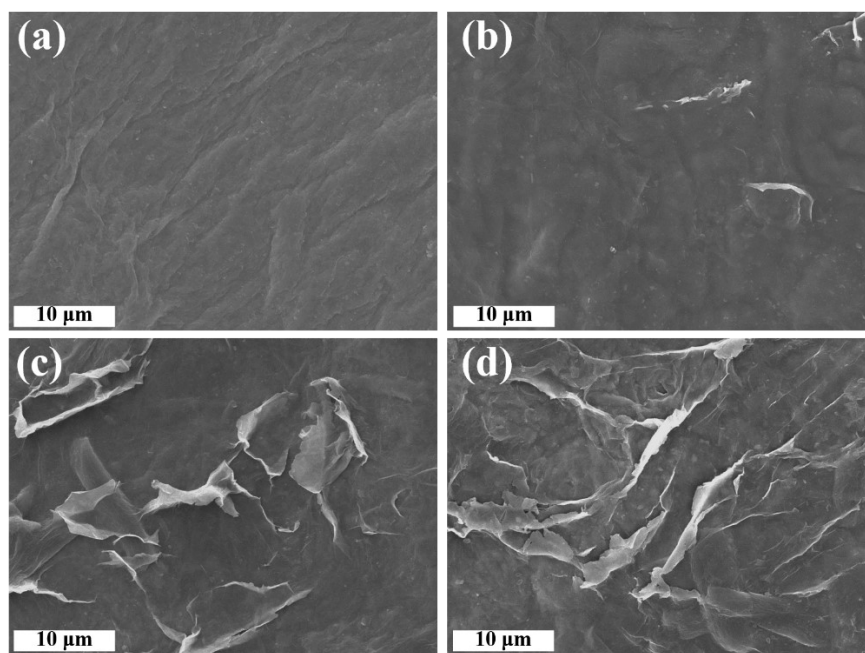

**Figure S5.** SEM surface images of CNF/PEDOT:PSS film (a), CNF/PEDOT:PSS/MXene-20 (b), CNF/PEDOT:PSS/MXene-50 (c) and CNF/PEDOT:PSS/MXene-80 (d).

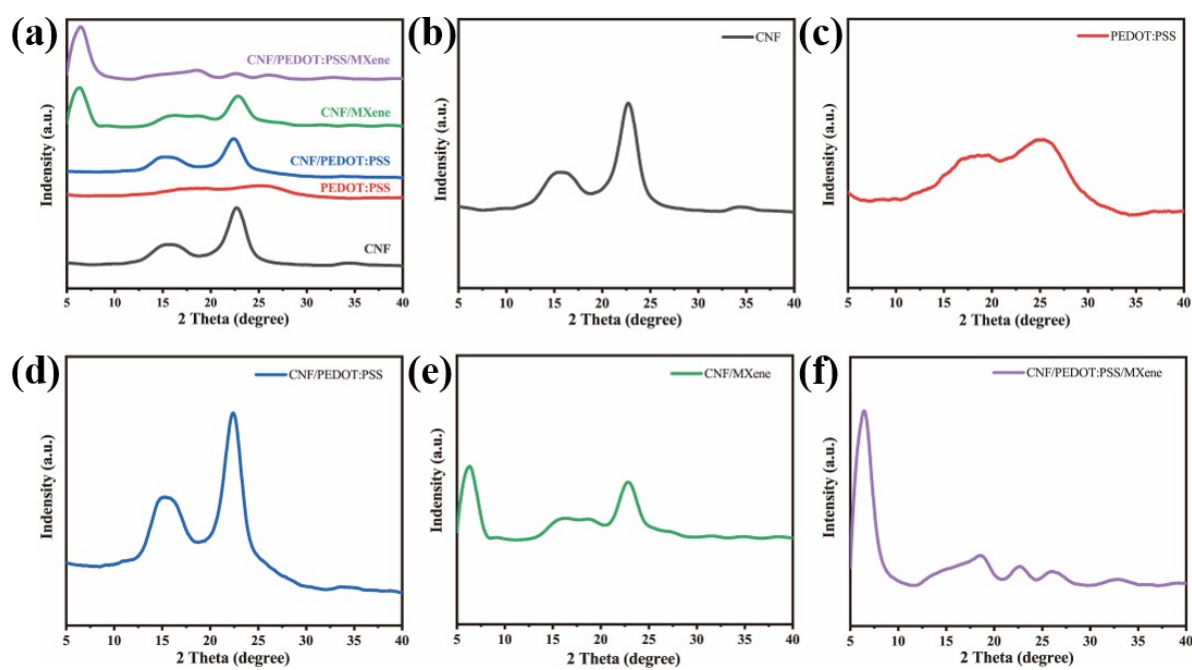

**Figure S6.** XRD patterns of CNF, PEDOT:PSS, MXene and their nanocomposite films.

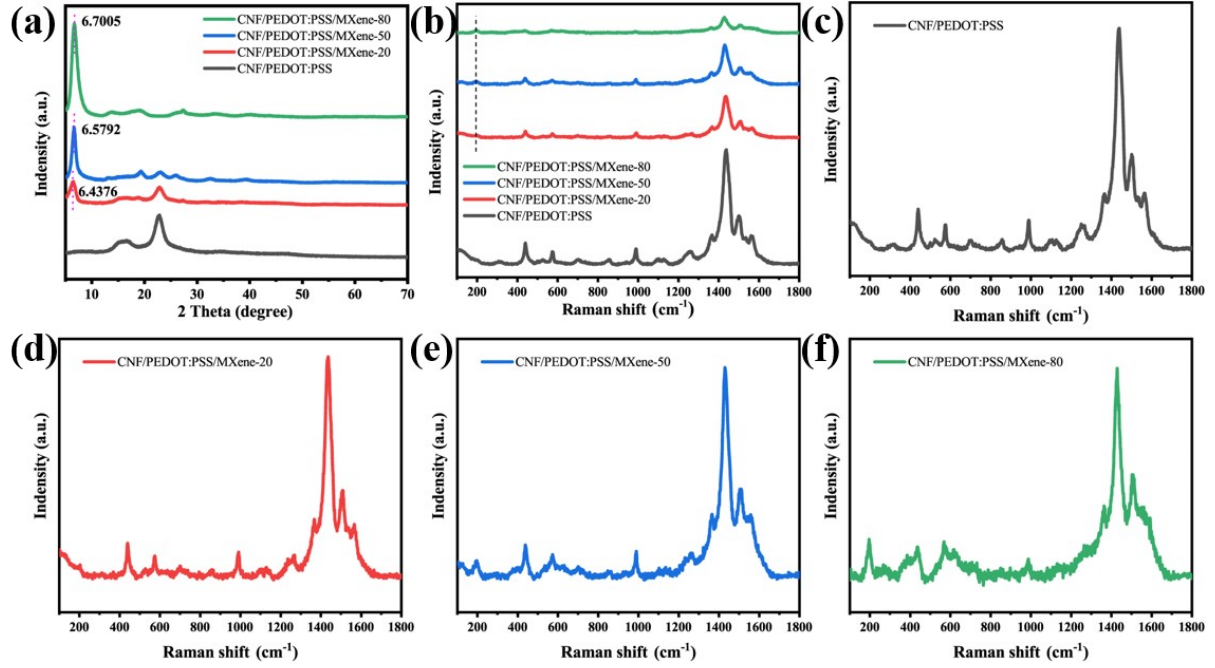

Figure S7. (a) XRD patterns and (b-f) Raman spectroscopy of CNF/PEDOT:PSS/MXene nanocomposite films.

**Table S1.** The comparison of EMI shielding performances and mechanical properties between CNF /PEDOT: PSS-MXene composite film and other MXene based film materials.

| Materials                                                                                | Thickness ( $\mu\text{m}$ ) | SE (dB) | Conductivity ( $\text{S cm}^{-1}$ ) | Tensile strength (MPa) | Frequency (GHz) | Ref. |
|------------------------------------------------------------------------------------------|-----------------------------|---------|-------------------------------------|------------------------|-----------------|------|
| $\text{Ti}_3\text{C}_2\text{T}_x/\text{chitosan}$                                        | 37                          | 34.7    | 14.02                               | -                      | 8.2–12.4        | 1    |
| $\text{Ti}_3\text{C}_2\text{T}_x/\text{PVA}$                                             | 27                          | 44.4    | 7.16                                | -                      | 8.2–12.4        | 2    |
| $\text{Ti}_3\text{C}_2\text{T}_x/\text{PEDOT:PSS}$                                       | 11                          | 42.1    | 340.50                              | 13.71                  | 8.2–12.4        | 3    |
| $\text{Ti}_3\text{C}_2\text{T}_x/\text{AgNW}/\text{nanocellulose}$                       | 17                          | 42.74   | 300.00                              | 63.8                   | 8.2–12.4        | 4    |
| $\text{Ti}_3\text{C}_2\text{T}_x/\text{PANI}$                                            | 40                          | 36      | 24.40                               | 19.9                   | 8.2–12.4        | 5    |
| $\text{Ti}_3\text{C}_2\text{T}_x/\text{PEDOT:PSS}$                                       | 6.6                         | 40.5    | 675.20                              | 38.5                   | 8.2–12.4        | 6    |
| $\text{Ti}_3\text{C}_2\text{T}_x/\text{Al}$                                              | 39                          | 80      | 2656.00                             | 83.2                   | 8.2–12.4        | 7    |
| $\text{Ti}_3\text{C}_2\text{T}_x/\text{CNF}$                                             | 167                         | 25      | 7.394                               | 135.4                  | 8.2–12.4        | 8    |
| $\text{Ti}_3\text{C}_2\text{T}_x/\text{TOCNF}$                                           | 38                          | 39.6    | 28.37                               | 212                    | 8.2–12.4        | 9    |
| $\text{Ti}_3\text{C}_2\text{T}_x/\text{CNF}/\text{AgNW}$                                 | 46                          | 50.7    | 5.882                               | 32.1                   | 8.2–12.4        | 10   |
| $\text{Ti}_3\text{C}_2\text{T}_x/\text{aramid nanofibers}$                               | 12                          | 34.7    | -                                   | 46.5                   | 8.2–12.4        | 11   |
| $\text{Ti}_3\text{C}_2\text{T}_x/\text{CNT}/\text{CNF}$                                  | 38                          | 38.4    | 25.07                               | 97.9                   | 8.2–12.4        | 12   |
| $\text{Ti}_3\text{C}_2\text{T}_x/\text{polyacrylonitrile}/\text{TiO}_2$<br>/polydopamine | 45                          | 32      | 92.68                               | 93.55                  | 8.2–12.4        | 13   |
| $\text{Ti}_3\text{C}_2\text{T}_x/\text{AgNW}/\text{PVDF}$                                | 300                         | 25.87   | 1.08                                | -                      | 8.2–12.4        | 14   |
| CNT/cellulose                                                                            | 150                         | 35      | 20                                  | 26.9                   | 8.2–12.4        | 15   |
| CNT/CNF                                                                                  | 150                         | 46.4    | 31.87                               | 48                     | 8.2–12.4        | 16   |
| $\text{Ti}_3\text{C}_2\text{T}_x/\text{CNF}$                                             | 192                         | 29.3    | -                                   | -                      | 8.2–12.4        | 17   |

|                                                             |    |       |         |       |          |           |
|-------------------------------------------------------------|----|-------|---------|-------|----------|-----------|
| Ti <sub>3</sub> C <sub>2</sub> T <sub>x</sub> /CNF          | 40 | 30    | 140.85  | 35    | 8.2–12.4 | 18        |
| CNF/PEDOT:PSS/Ti <sub>3</sub> C <sub>2</sub> T <sub>x</sub> | 44 | 76.99 | 2640.55 | 25.5  | 8.2–12.4 | This work |
| CNF/PEDOT:PSS/Ti <sub>3</sub> C <sub>2</sub> T <sub>x</sub> | 58 | 76.99 | 1903.02 | 59.99 | 8.2–12.4 | This work |
| CNF/PEDOT:PSS/Ti <sub>3</sub> C <sub>2</sub> T <sub>x</sub> | 63 | 39.78 | 21.9    | 73.86 | 8.2–12.4 | This work |

## References

- 1 F. Liu, Y. Li, S. Hao, Y. Cheng, Y. Zhan, C. Zhang, Y. Meng, Q. Xie and H. Xia, *Carbohydr. Polym.*, 2020, **243**, 116467.
- 2 X. Jin, J. Wang, L. Dai, X. Liu, L. Li, Y. Yang, Y. Cao, W. Wang, H. Wu and S. Guo, *Chem. Eng. J.*, 2020, **380**, 122475.
- 3 R. Liu, M. Miao, Y. Li, J. Zhang, S. Cao and X. Feng, *ACS Appl. Mater. Interfaces*, 2018, **10**, 44787–44795.
- 4 M. Miao, R. Liu, S. Thaiboonrod, L. Shi, S. Cao, J. Zhang, J. Fang and X. Feng, *J. Mater. Chem. C*, 2020, **8**, 3120–3126.
- 5 Y. Zhang, L. Wang, J. Zhang, P. Song, Z. Xiao, C. Liang, H. Qiu, J. Kong and J. Gu, *Compos. Sci. Technol.*, 2019, **183**, 107833.
- 6 Y.-J. Wan, X.-M. Li, P.-L. Zhu, R. Sun, C.-P. Wong and W.-H. Liao, *Compos. Part Appl. Sci. Manuf.*, 2020, **130**, 105764.
- 7 Z. Liu, Y. Zhang, H.-B. Zhang, Y. Dai, J. Liu, X. Li and Z.-Z. Yu, *J. Mater. Chem. C*, 2020, **8**, 1673–1678.
- 8 W. Cao, F. Chen, Y. Zhu, Y. Zhang, Y. Jiang, M. Ma and F. Chen, *ACS Nano*, 2018, **12**, 4583–4593.
- 9 Z. Zhan, Q. Song, Z. Zhou and C. Lu, *J. Mater. Chem. C*, 2019, **7**, 9820–9829.
- 10 W. Xin, G. Xi, W. Cao, C. Ma, T. Liu, M. Ma and J. Bian, *RSC Adv.*, 2019, **9**, 29636–29644.
- 11 H. Wei, M. Wang, W. Zheng, Z. Jiang and Y. Huang, *Ceram. Int.*, 2020, **46**, 6199–6204.
- 12 W. Cao, C. Ma, S. Tan, M. Ma, P. Wan and F. Chen, *Nano-Micro Lett.*, 2019, **11**, 1–17.
- 13 M. Aakyiir, M.-A. S. Kingu, S. Araby, Q. Meng, J. Shao, Y. Amer and J. Ma, *J. Appl. Polym. Sci.*, 2021, **138**, 50509.
- 14 H. Cheng, Y. Pan, Q. Chen, R. Che, G. Zheng, C. Liu, C. Shen and X. Liu, *Adv. Compos. Hybrid Mater.*, 2021, **4**, 505–513.
- 15 L.-Q. Zhang, B. Yang, J. Teng, J. Lei, D.-X. Yan, G.-J. Zhong and Z.-M. Li, *J. Mater. Chem. C*, 2017, **5**, 3130–3138.
- 16 H. Zhang, X. Sun, Z. Heng, Y. Chen, H. Zou and M. Liang, *Ind. Eng. Chem. Res.*, 2018, **57**, 17152–17160.
- 17 Y. Zhan, Y. Meng and Q. Xie, *J. Appl. Polym. Sci.*, 2021, **138**, 50597.
- 18 Z. Cui, C. Gao, Z. Fan, J. Wang, Z. Cheng, Z. Xie, Y. Liu and Y. Wang, *J. Electron. Mater.*, 2021, **50**, 2101–2110.
